# Supplementary material for: Photocatalytic production of ethylene and propionic acid from plastic waste by titania-supported atomically dispersed Pd species
Source: PubMed Central journal article supplement — Sci Adv. 2023 Dec 8;9(49):eadk2407. doi: 10.1126/sciadv.adk2407 (PMC10708183; doi:10.1126/sciadv.adk2407), 2023-12-08
Supplement: sciadv.adk2407_sm.pdf [file sciadv.adk2407_sm.pdf]

## Supplementary Materials for

### Photocatalytic production of ethylene and propionic acid from plastic waste by titania-supported atomically dispersed Pd species

Shuai Zhang *et al.*

Corresponding author: Jingrun Ran, [jingrun.ran@adelaide.edu.au](mailto:jingrun.ran@adelaide.edu.au); Shi-Zhang Qiao, [s.qiao@adelaide.edu.au](mailto:s.qiao@adelaide.edu.au)

*Sci. Adv.* **9**, eadk2407 (2023)  
DOI: 10.1126/sciadv.adk2407

#### **This PDF file includes:**

Figs. S1 to S18  
Tables S1 to S10  
References

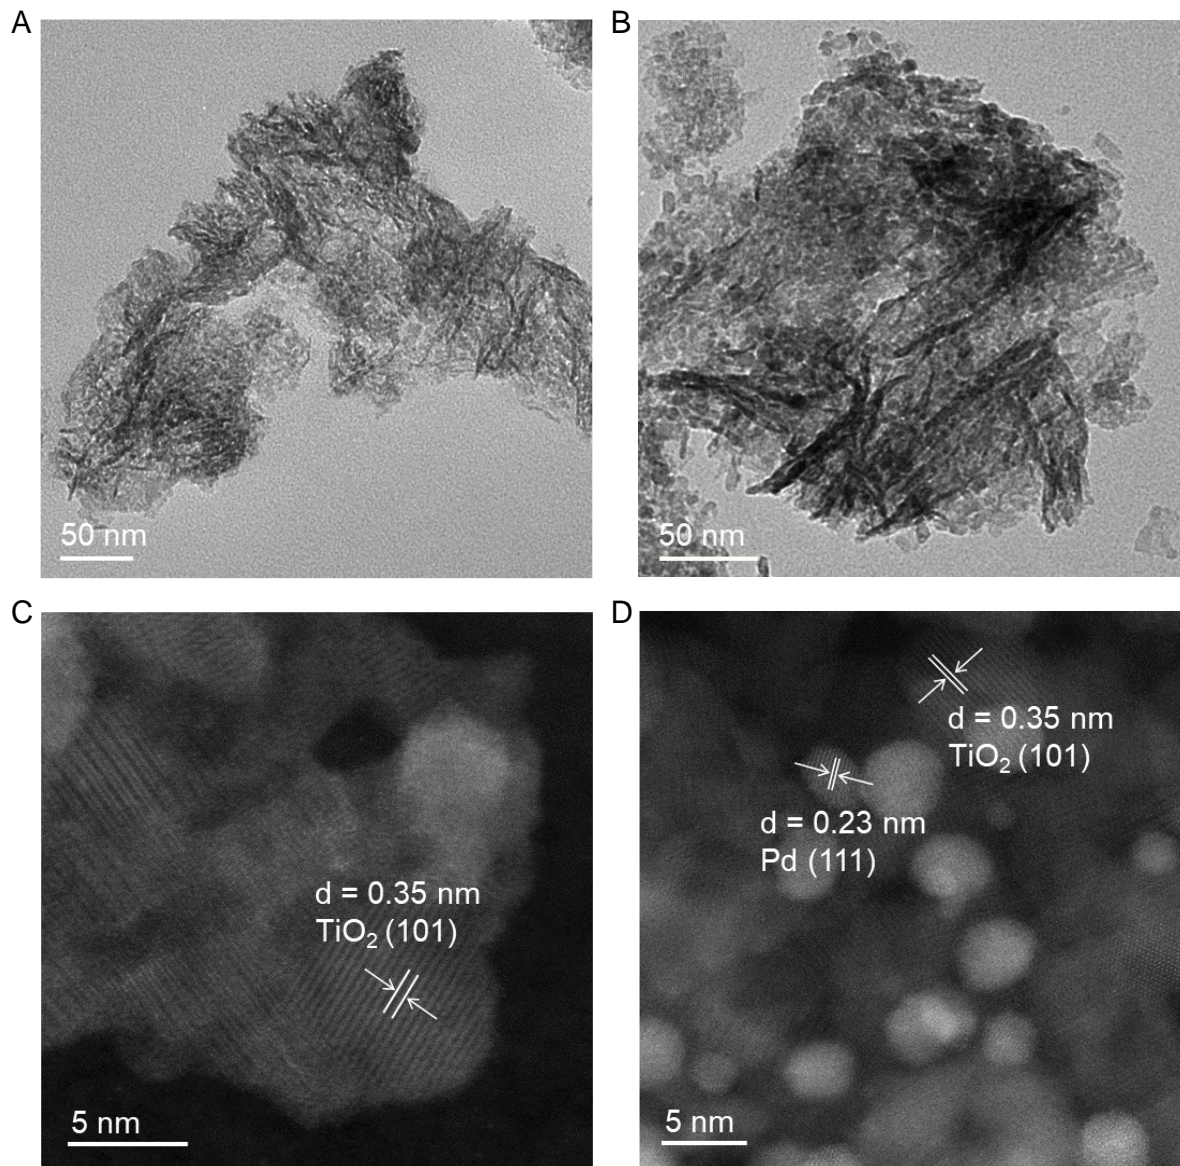

**Fig. S1. Morphology characterizations.** High-resolution transmission electron microscopy (HRTEM) images of (A) TiO<sub>2</sub> and (B) Pd<sub>n</sub>-TiO<sub>2</sub>. High-angle annular dark-field scanning transmission electron microscopy (HAADF-STEM) images of (C) TiO<sub>2</sub> and (D) Pd<sub>n</sub>-TiO<sub>2</sub>.

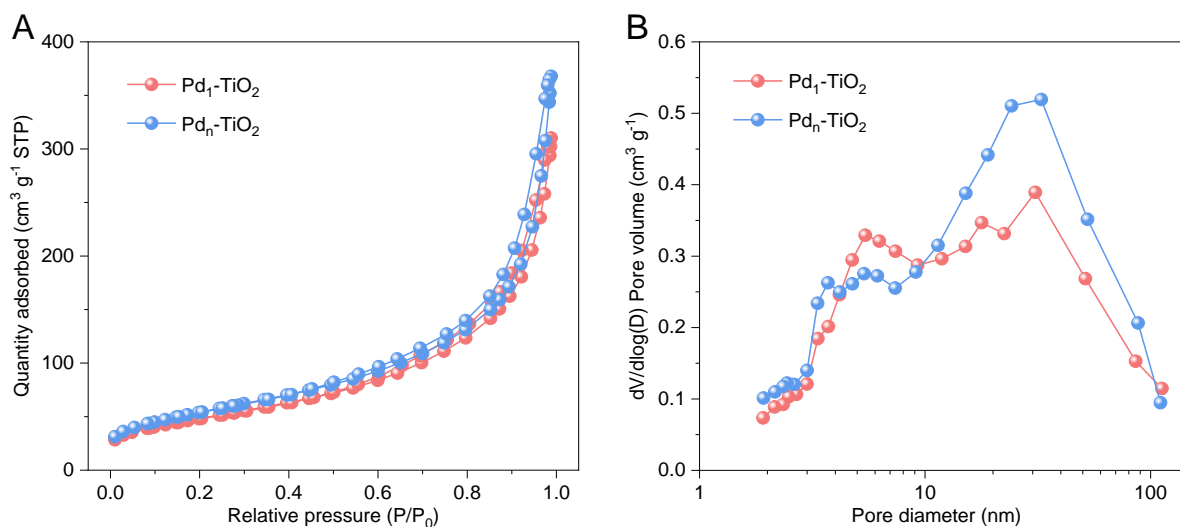

**Fig. S2. Nitrogen (N<sub>2</sub>) adsorption analysis.** (A) N<sub>2</sub> adsorption-desorption isotherms and (B) the corresponding pore size distributions for Pd<sub>1</sub>-TiO<sub>2</sub> and Pd<sub>n</sub>-TiO<sub>2</sub>.

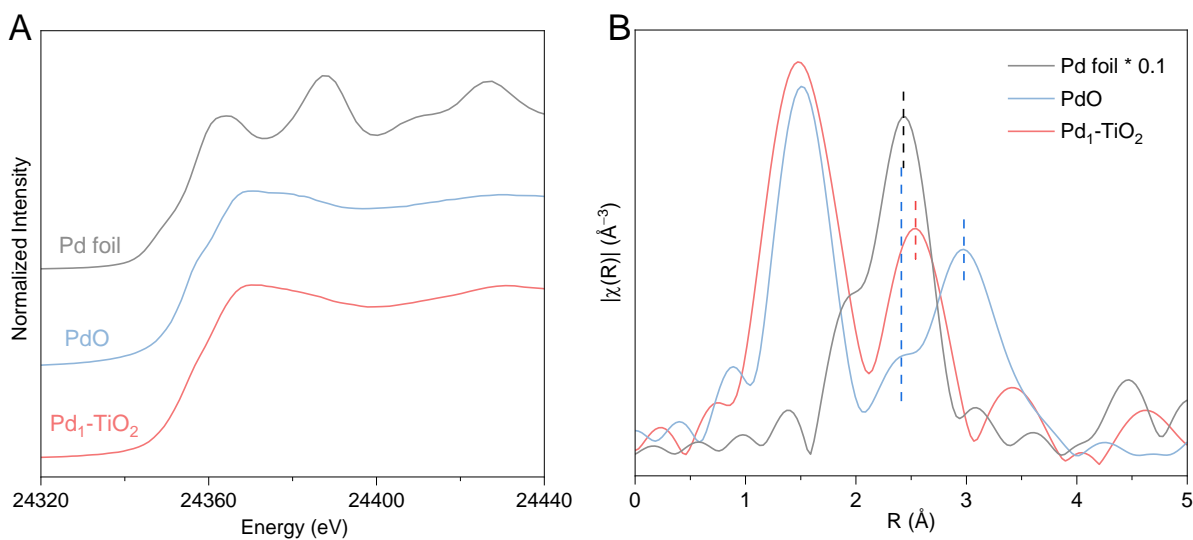

**Fig. S3. Atomic structure characterizations.** (A) Pd K-edge X-ray absorption near edge structure spectra and (B) Fourier-transformed  $k^2$ -weighted extended X-ray absorption fine structure (EXAFS) spectra for Pd foil, PdO and Pd<sub>1</sub>-TiO<sub>2</sub>.

fig. S3B exhibits a shoulder for PdO reference, which is closely aligned with the Pd foil. The EXAFS fitting in table S2 indicates that the shoulder peak can be assigned to Pd-Pd coordination.

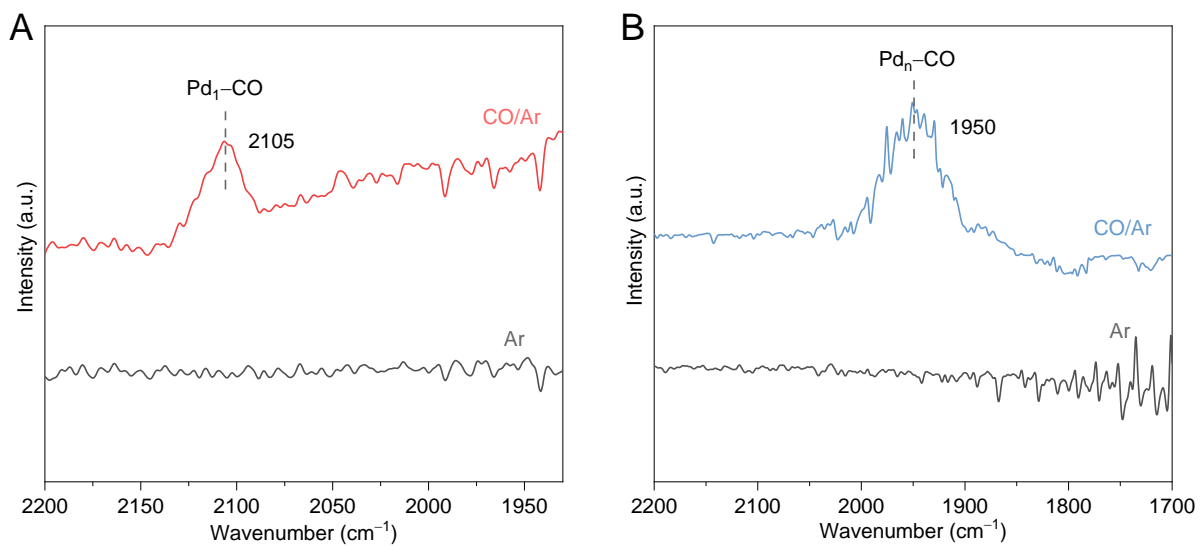

**Fig. S4. CO adsorption diffuse reflectance infrared Fourier transform spectroscopy (DRIFTS) spectra. (A) Pd<sub>1</sub>-TiO<sub>2</sub> and (B) Pd<sub>n</sub>-TiO<sub>2</sub>.**

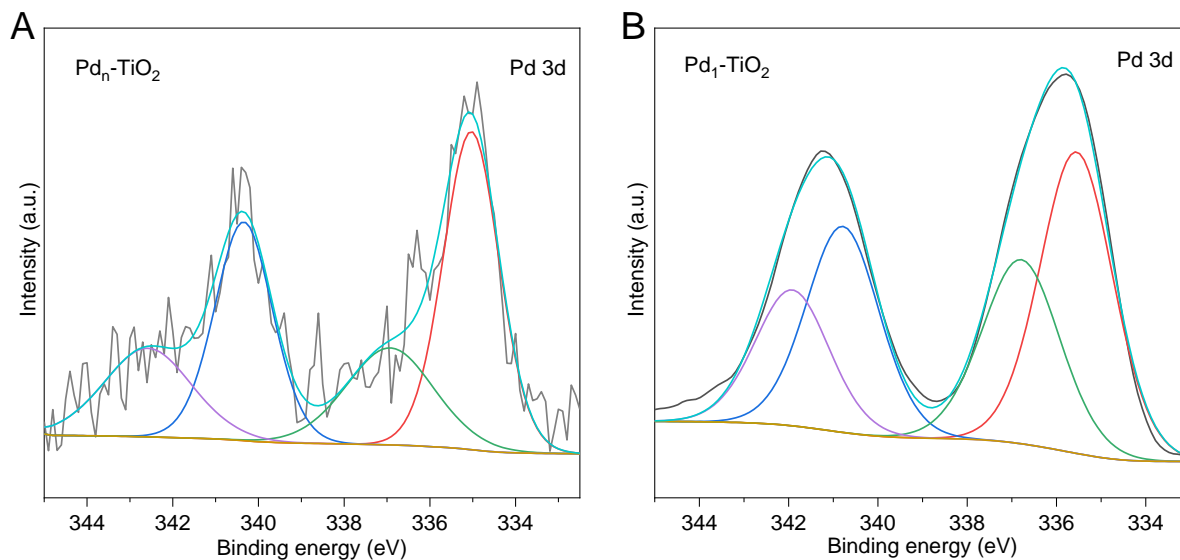

**Fig. S5. Pd 3d X-ray photoelectron spectroscopy (XPS) spectra. (A) Pd<sub>n</sub>-TiO<sub>2</sub> and (B) Pd<sub>1</sub>-TiO<sub>2</sub>.**

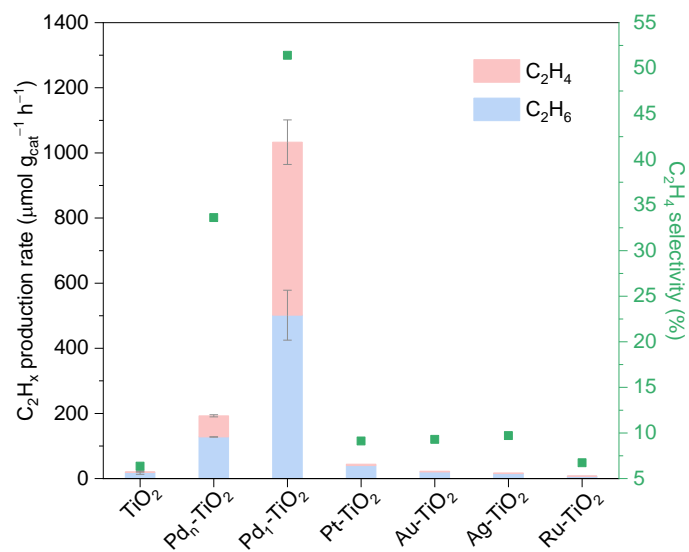

**Fig. S6. C<sub>2</sub> hydrocarbon (C<sub>2</sub>H<sub>x</sub>) production for bare TiO<sub>2</sub> and a series of TiO<sub>2</sub> catalysts modified with metal species following 3 h of photoreaction.**

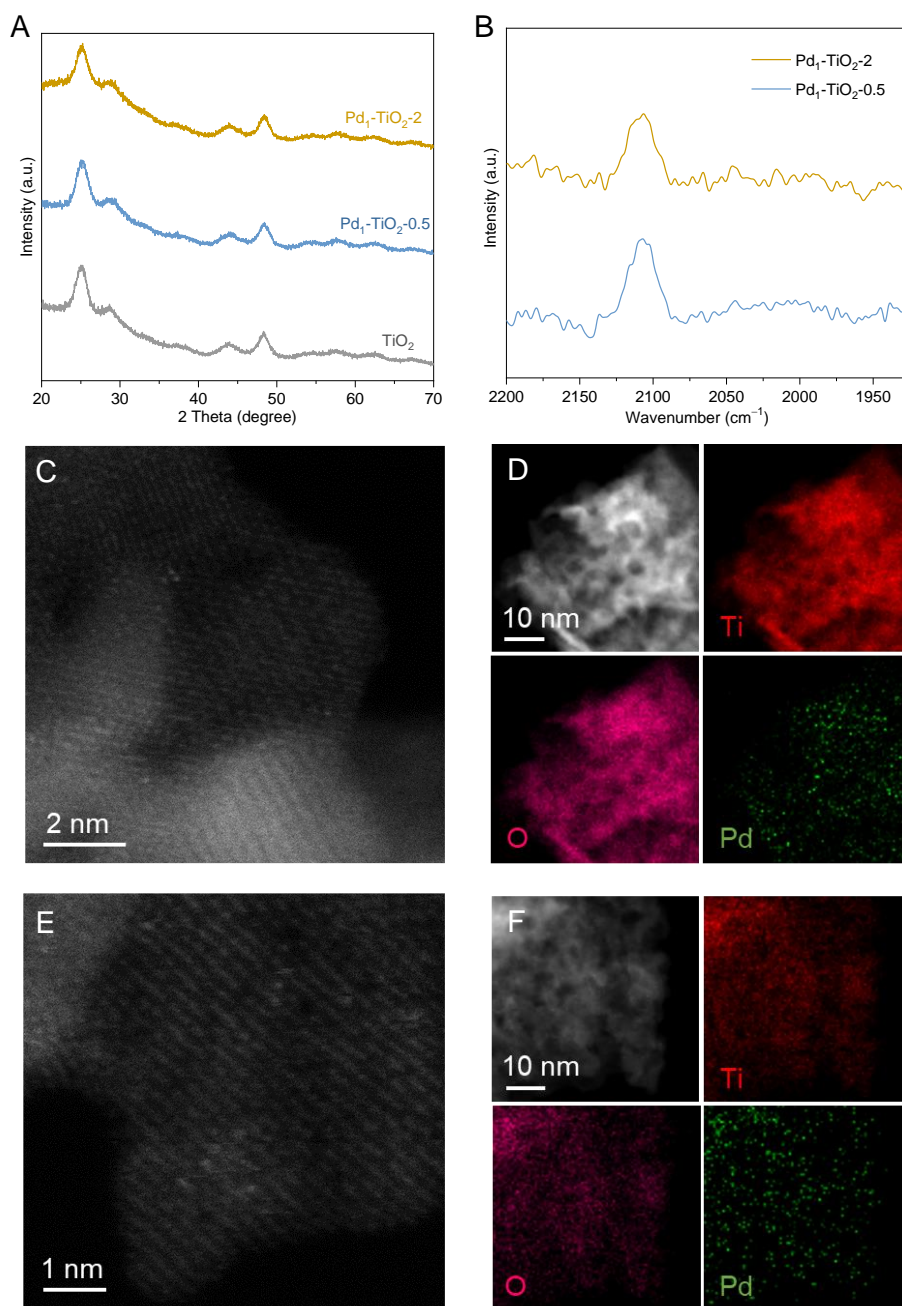

**Fig. S7. Characterization of Pd<sub>1</sub>-TiO<sub>2</sub>-0.5 and Pd<sub>1</sub>-TiO<sub>2</sub>-2.** (A) X-ray diffraction (XRD) patterns for TiO<sub>2</sub>, Pd<sub>1</sub>-TiO<sub>2</sub>-0.5 and Pd<sub>1</sub>-TiO<sub>2</sub>-2. (B) CO adsorption DRIFTS spectra of Pd<sub>1</sub>-TiO<sub>2</sub>-0.5 and Pd<sub>1</sub>-TiO<sub>2</sub>-2. (C) HAADF-STEM image and (D) Energy dispersive spectroscopy (EDS) mapping of Pd<sub>1</sub>-TiO<sub>2</sub>-0.5. (E) HAADF-STEM image and (F) EDS mapping of Pd<sub>1</sub>-TiO<sub>2</sub>-2.

The XRD patterns for Pd<sub>1</sub>-TiO<sub>2</sub>-0.5 and Pd<sub>1</sub>-TiO<sub>2</sub>-2 exhibit the diffraction peaks for anatase TiO<sub>2</sub> without Pd-related features (fig. S7A). For the CO adsorption, a typical band for linearly adsorbed CO is observed at 2050~2150 cm<sup>-1</sup> (fig. S7B). The result indicates the atomic dispersion of Pd species on Pd<sub>1</sub>-TiO<sub>2</sub>-0.5 and Pd<sub>1</sub>-TiO<sub>2</sub>-2. This is also confirmed by the HAADF-STEM images (fig. S7, C to F), in which atomic Pd sites are dispersed on TiO<sub>2</sub> nanosheets.

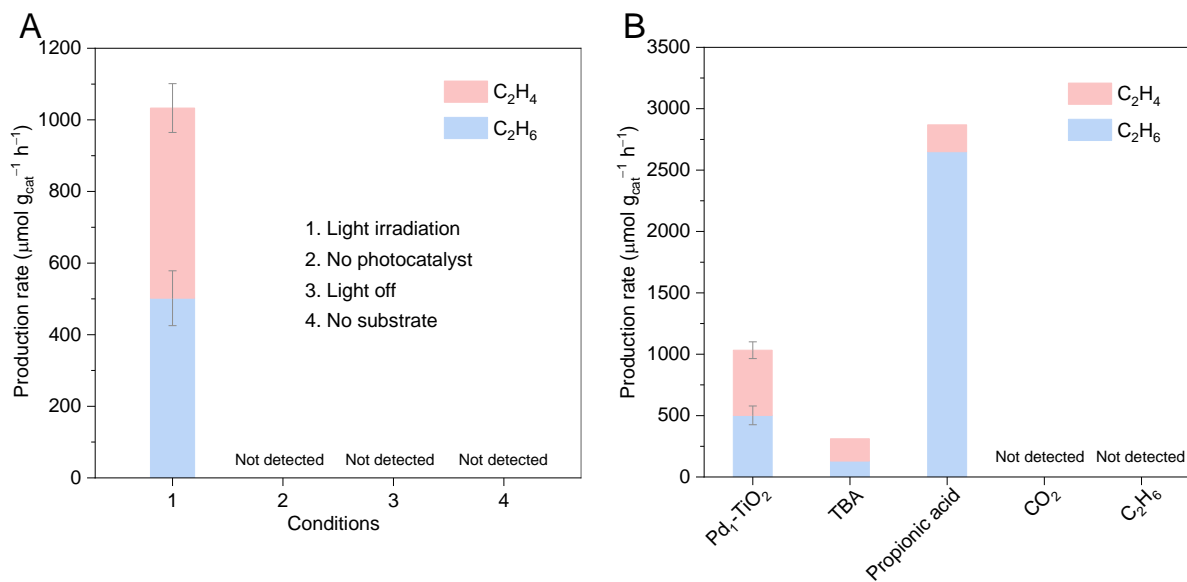

**Fig. S8. Control experiments.** (A) Summary of experimental control conditions for photocatalytic substrate oxidation over  $\text{Pd}_1\text{-TiO}_2$ . (B) Photocatalytic generation of  $\text{C}_2$  hydrocarbons on  $\text{Pd}_1\text{-TiO}_2$  by converting succinic acid in the presence of tert-butanol or by using different starting substrates such as propionic acid,  $\text{CO}_2$ , and ethane ( $\text{C}_2\text{H}_6$ ).  $\text{C}_2$  hydrocarbon production is expressed per mass of photocatalyst.

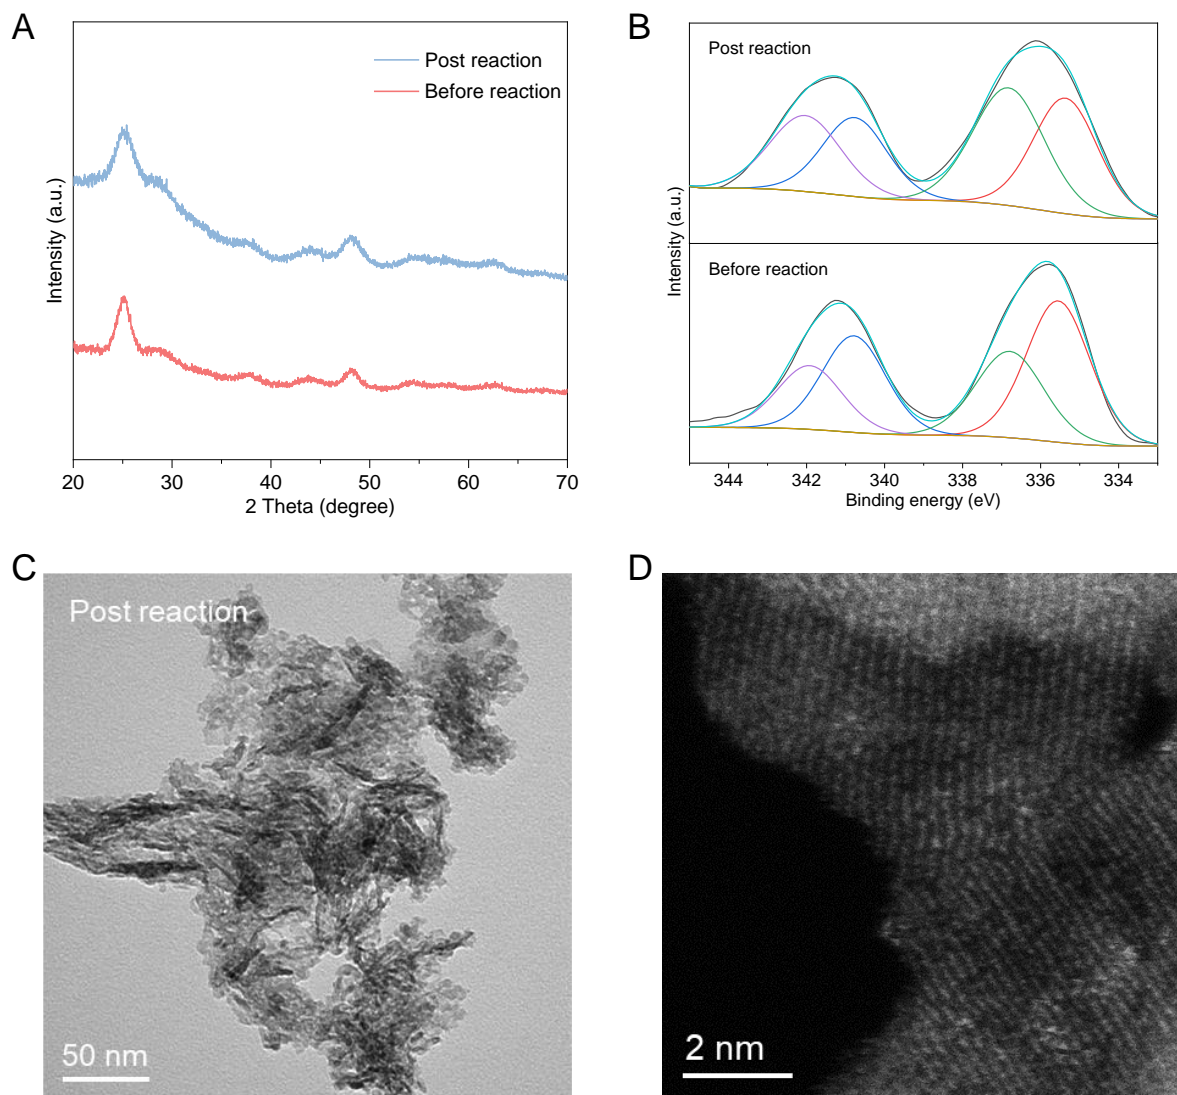

**Fig. S9. Material characterization of the post-reaction sample.** (A) XRD pattern, (B) Pd 3d XPS spectra, (C) HRTEM and (D) HAADF-STEM images of Pd<sub>1</sub>-TiO<sub>2</sub>.



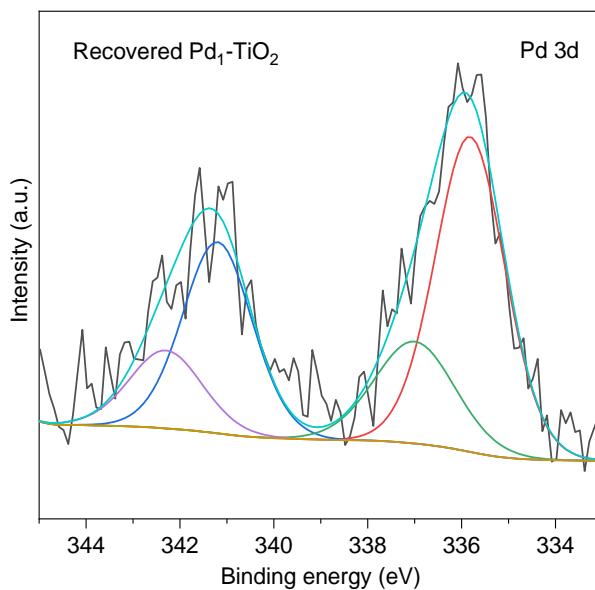

**Fig. S10.** Pd 3d XPS spectrum of the recovered Pd<sub>1</sub>-TiO<sub>2</sub> after illumination and vacuum drying.

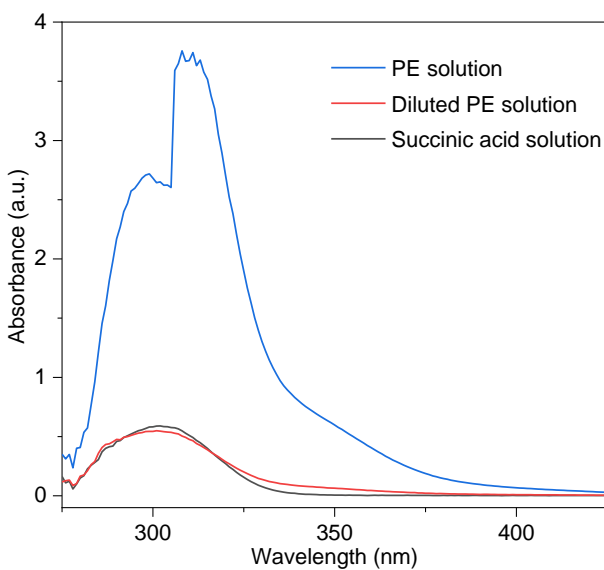

**Fig. S11.** UV-vis absorption spectra of succinic acid substrate solution, diluted PE decomposition solution, and pure polyethylene (PE) decomposition solution.

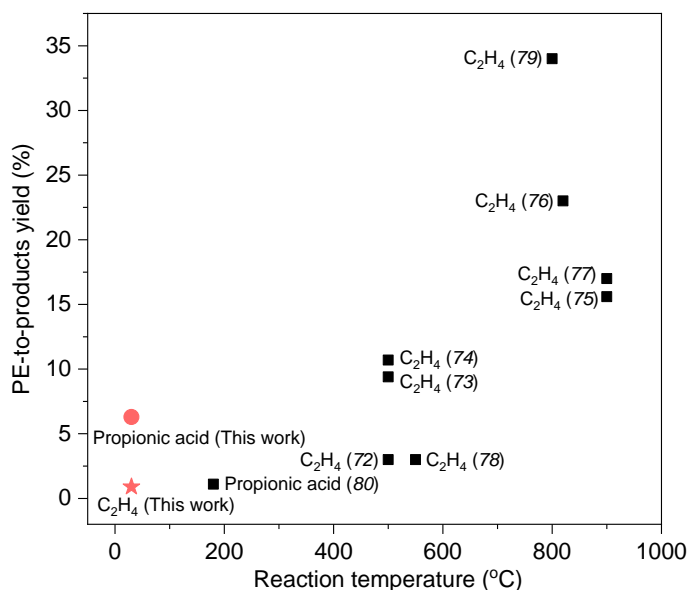

**Fig. S12. The PE-to-single product (C<sub>2</sub>H<sub>4</sub> or propionic acid) conversion achieved via oxidation-photocatalysis and high-temperature thermocatalysis.** Catalysts and reaction processes for reported data are as follows: Y zeolite pyrolysis (72), HZSM-5 pyrolysis (73), Al(OH)<sub>3</sub> pyrolysis (74), HZSM-11 pyrolysis (75), blend with naphtha for pyrolysis-steam cracking (76), biomass co-gasification (77), HZSM-5 pyrolysis-steam cracking (78), non-catalysis pyrolysis (79) and microwave assisted chemical oxidation (80).

Selected reports on thermocatalytic conversion of plastic waste into C<sub>2</sub>H<sub>4</sub>/propionic acid were added in fig. S12 for comparison with our low-temperature oxidation-photocatalysis. Pyrolysis of PE waste requires high temperatures (>450 °C) and yields the major products of C<sub>5</sub>-C<sub>20+</sub> hydrocarbons as well as C<sub>1</sub>-C<sub>4</sub> hydrocarbons. High temperatures, fluidized bed systems and catalysts were explored to improve C<sub>2</sub>H<sub>4</sub> recovery. Gasification of PE is conducted at >600°C to convert carbon-based feedstocks into primarily gaseous products. Steam gasification of PE has been reported to produce C<sub>2</sub>H<sub>4</sub> at relatively high temperature (900 °C). Two step processes, including gasification-FT synthesis, pyrolysis-steam cracking, can achieve a high yield of light olefins. Propionic acid has been rarely reported to be generated from PE waste. Microwave-assisted chemical oxidation of PE yields a series of carboxylic acids including a portion of propionic acid.

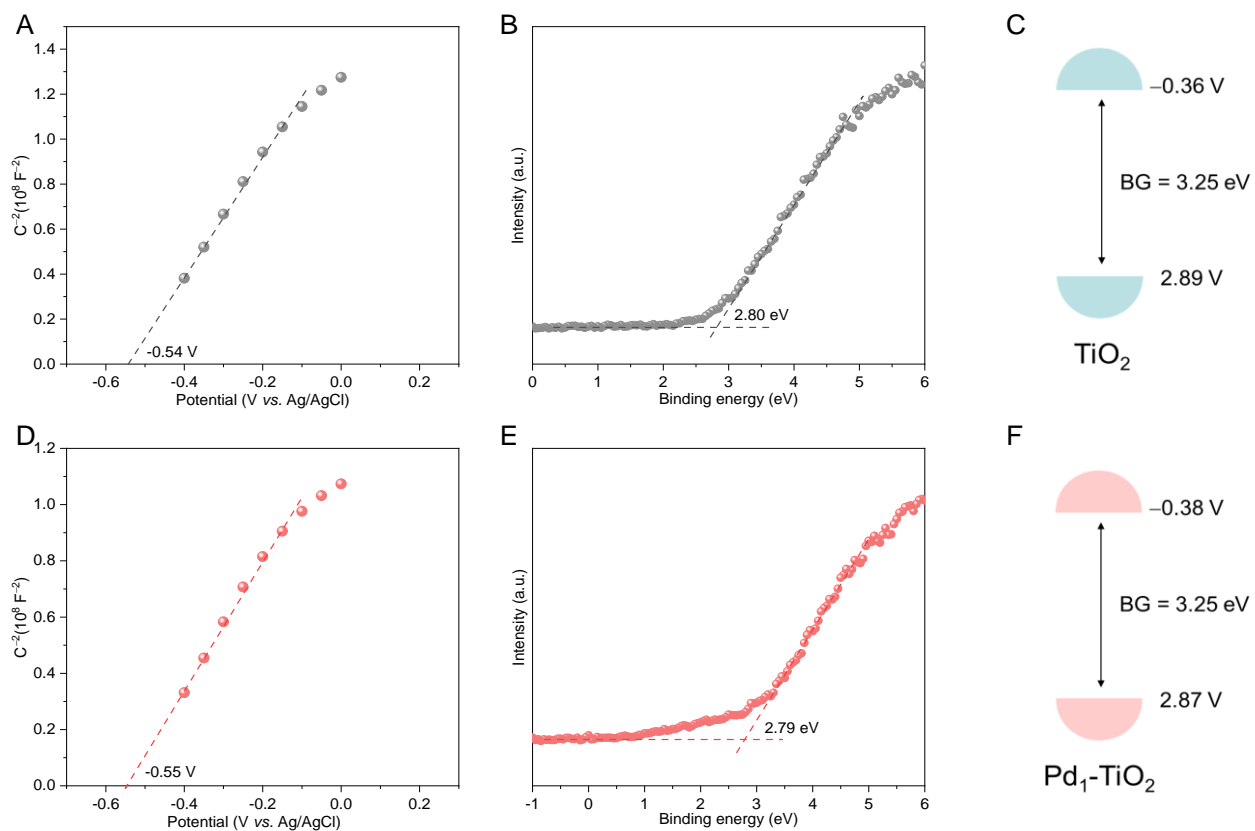

**Fig. S13. Energy band structure characterizations.** (A) Mott-Schottky (MS) plot, (B) XPS valence band (VB) spectrum and (C) schematic for energy band structure for  $\text{TiO}_2$ . (D) MS plot, (E) XPS VB spectrum and (F) schematic for energy band structure for  $\text{Pd}_1\text{-TiO}_2$ .

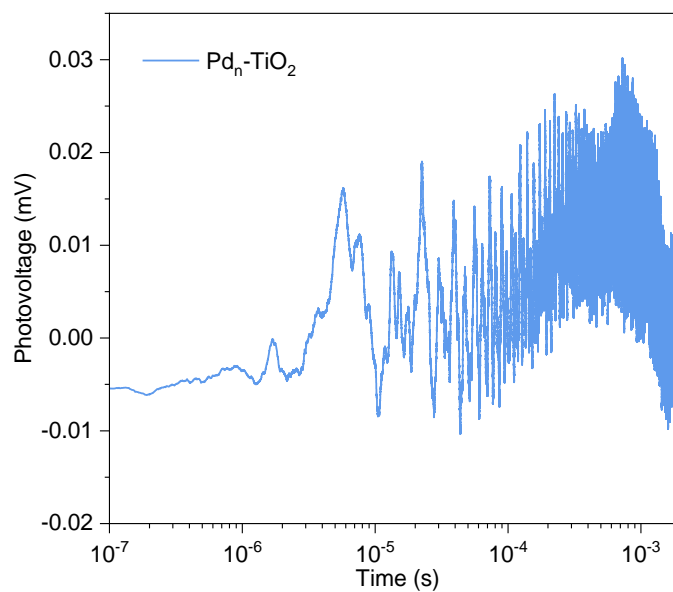

**Fig. S14. Transient surface photovoltage spectrum for Pd<sub>n</sub>-TiO<sub>2</sub>.**

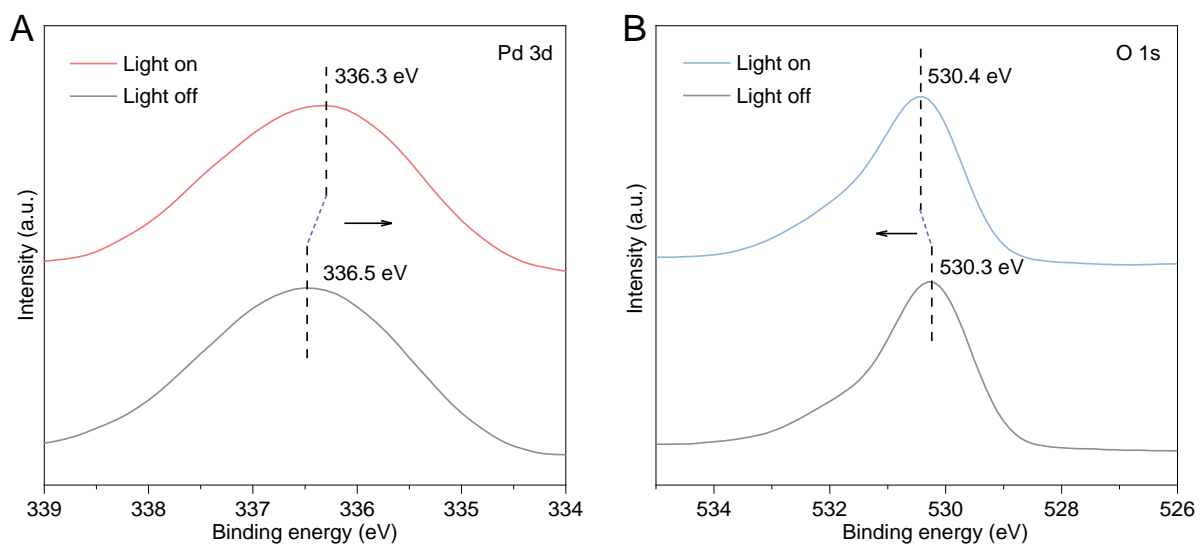

**Fig. S15. XPS spectra.** (A) An enlarged view of Pd 3d XPS spectrum and (B) O 1s XPS spectrum for Pd<sub>1</sub>-TiO<sub>2</sub> in dark and under illumination.

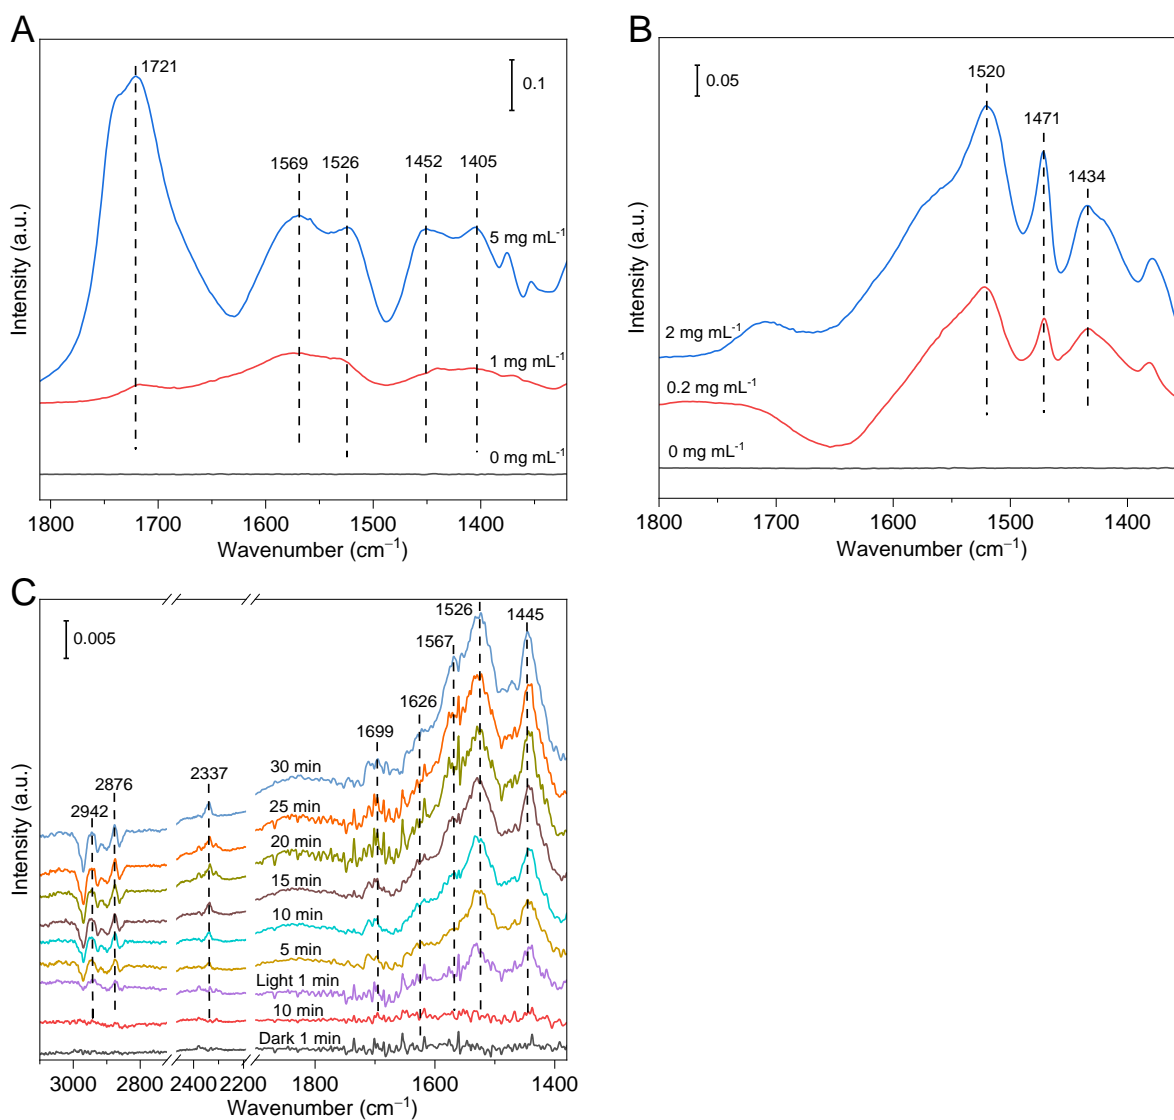

**Fig. S16. DRIFTS characterizations.** DRIFTS spectra for different concentrations of (A) succinic acid and (B) propionic acid on Pd<sub>1</sub>-TiO<sub>2</sub> in the dark. (C) In situ DRIFTS spectra for the substrate conversion on Pd<sub>n</sub>-TiO<sub>2</sub>.

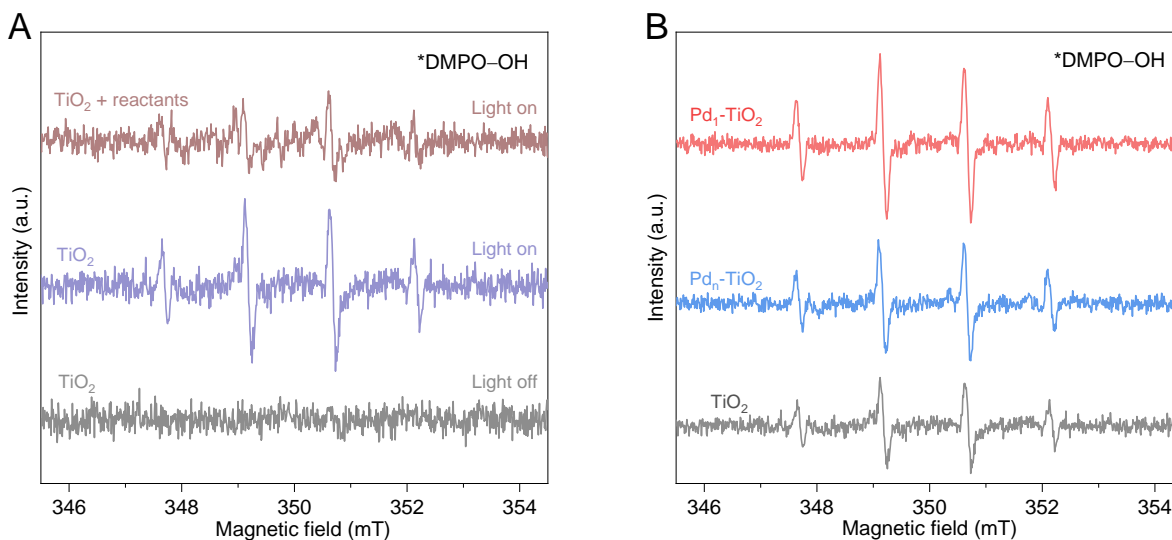

**Fig. S17. Electron paramagnetic resonance (EPR) characterization.** (A) In situ EPR spectra for  $\text{TiO}_2$  with and without reaction substrates under light irradiation. (B) In situ EPR spectra for hydroxyl radical ( $\cdot\text{OH}$ ) detection over  $\text{TiO}_2$ ,  $\text{Pd}_1\text{-TiO}_2$  and  $\text{Pd}_n\text{-TiO}_2$  without reaction substrates under light irradiation.

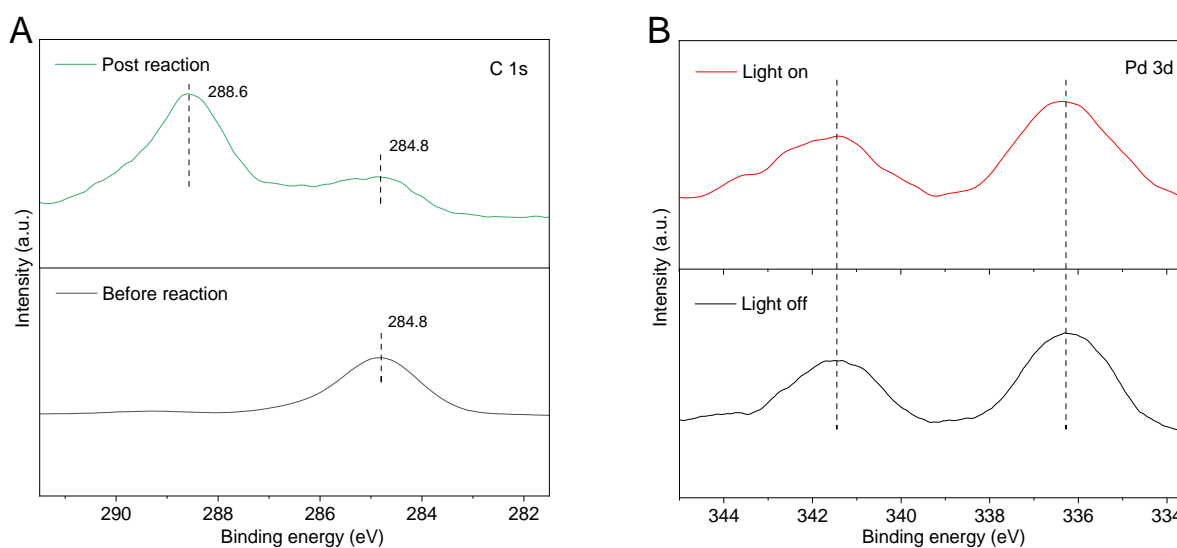

**Fig. S18. XPS spectra.** (A) C 1s XPS spectra for  $\text{Pd}_1\text{-TiO}_2$  before and after photoreaction. (B) In situ high-resolution Pd 3d XPS spectra for  $\text{Pd}_1\text{-TiO}_2$  with the substrate and illumination.

**Table S1. Physicochemical properties of Pd<sub>1</sub>-TiO<sub>2</sub> and Pd<sub>n</sub>-TiO<sub>2</sub>.**

| Sample                            | Pd (wt.%) | Surface area (m <sup>2</sup> g <sup>-1</sup> ) | Average pore size (nm) |
|-----------------------------------|-----------|------------------------------------------------|------------------------|
| Pd <sub>1</sub> -TiO <sub>2</sub> | 0.64      | 176                                            | 9.9                    |
| Pd <sub>n</sub> -TiO <sub>2</sub> | 0.70      | 199                                            | 10.7                   |

**Table S2. EXAFS fitting results for Pd<sub>1</sub>-TiO<sub>2</sub> and PdO.** CN is the coordination number, R distance between absorber and backscatter atoms and  $\sigma^2$  Debye-Waller factor.

| Sample                            | Shell            | CN  | R (Å) | $\sigma^2$ (Å <sup>2</sup> ) |
|-----------------------------------|------------------|-----|-------|------------------------------|
| Pd <sub>1</sub> -TiO <sub>2</sub> | Pd-O             | 2.9 | 2.05  | 0.006                        |
|                                   | Pd-Pd            | 3.0 | 2.75  | 0.011                        |
|                                   | Pd-Ti            | 2.1 | 2.94  | 0.012                        |
| PdO                               | Pd-O             | 1.8 | 2.02  | 0.003                        |
|                                   | Pd-Pd (shoulder) | 1.1 | 2.92  | 0.004                        |
|                                   | Pd-Pd            | 0.8 | 2.96  | 0.002                        |

**Table S3. Photocatalytic generation of C<sub>2</sub> hydrocarbons from succinic acid substrate at different pH values over Pd<sub>1</sub>-TiO<sub>2</sub>.**

| pH value | C <sub>2</sub> H <sub>4</sub> production (μmol g <sub>cat</sub> <sup>-1</sup> h <sup>-1</sup> ) | C <sub>2</sub> H <sub>6</sub> production (μmol g <sub>cat</sub> <sup>-1</sup> h <sup>-1</sup> ) |
|----------|-------------------------------------------------------------------------------------------------|-------------------------------------------------------------------------------------------------|
| 1        | 192.51                                                                                          | 124.04                                                                                          |
| 4        | 531.16                                                                                          | 501.84                                                                                          |
| 7        | 4.59                                                                                            | 6.85                                                                                            |
| 10       | N/A                                                                                             | N/A                                                                                             |

**Table S4. Photocatalytic generation of C<sub>2</sub> hydrocarbons from succinic acid substrate over Pd<sub>1</sub>-TiO<sub>2</sub> at 30°C, 50°C and 70°C.**

| Temperature (°C) | C <sub>2</sub> H <sub>4</sub> production (μmol g <sub>cat</sub> <sup>-1</sup> h <sup>-1</sup> ) | C <sub>2</sub> H <sub>6</sub> production (μmol g <sub>cat</sub> <sup>-1</sup> h <sup>-1</sup> ) |
|------------------|-------------------------------------------------------------------------------------------------|-------------------------------------------------------------------------------------------------|
| 30               | 531.16                                                                                          | 501.84                                                                                          |
| 50               | 498.41                                                                                          | 440.06                                                                                          |
| 70               | 444.88                                                                                          | 417.24                                                                                          |

**Table S5. Inductively coupled plasma optical emission spectrometry.** The Pd loading in Pd<sub>1</sub>-TiO<sub>2</sub> before and after photoreactions.

| Conditions      | Pd (wt.%) |
|-----------------|-----------|
| Before reaction | 0.64      |
| Post reaction   | 0.63      |

**Table S6. The amounts of H<sub>2</sub> and CO<sub>2</sub> evolved.** Photocatalytic substrate conversion over TiO<sub>2</sub>, Pd<sub>1</sub>-TiO<sub>2</sub> and Pd<sub>n</sub>-TiO<sub>2</sub> following 3 h light irradiation.

| Sample                            | Reaction time (h) | H <sub>2</sub> yield (mmol) | CO <sub>2</sub> yield (mmol) |
|-----------------------------------|-------------------|-----------------------------|------------------------------|
| TiO <sub>2</sub>                  | 3                 | N/A                         | 0.11                         |
| Pd <sub>1</sub> -TiO <sub>2</sub> | 3                 | 0.04                        | 0.49                         |
| Pd <sub>n</sub> -TiO <sub>2</sub> | 3                 | 0.03                        | 0.38                         |



**Table S7. Solar-driven upcycling of plastic waste for selected state-of-the-art catalysts.**

| Catalyst                                            | Substrate(s)                                                   | Light source(s)               | Catalyst mass (mg or $\text{cm}^{-2}$ ) | Time (h) | Gaseous product production ( $\mu\text{mol g}_{\text{cat}}^{-1} \text{h}^{-1}$ or $\mu\text{mol cm}^{-2} \text{h}^{-1}$ ) | Liquid phase product yield ( $\mu\text{mol}$ or %) | Reference |
|-----------------------------------------------------|----------------------------------------------------------------|-------------------------------|-----------------------------------------|----------|---------------------------------------------------------------------------------------------------------------------------|----------------------------------------------------|-----------|
| Pd <sub>1</sub> -TiO <sub>2</sub>                   | 10 mg mL <sup>-1</sup> succinic acid in 0.1 M HNO <sub>3</sub> | 365 nm LED                    | 10                                      | 3        | C <sub>2</sub> H <sub>4</sub> : 531.16, C <sub>2</sub> H <sub>6</sub> : 501.84<br>H <sub>2</sub> , CO <sub>2</sub>        | Propionic acid: 493.3                              | This work |
| Pd <sub>1</sub> -TiO <sub>2</sub>                   | 2 mg mL <sup>-1</sup> PE solution                              | 365 nm LED                    | 30                                      | 3        | C <sub>2</sub> H <sub>4</sub> : 23.28, C <sub>2</sub> H <sub>6</sub> : 32.73<br>H <sub>2</sub> , CO <sub>2</sub>          | Propionic acid: 23.9                               | This work |
| P25 Pt                                              | 10 mg mL <sup>-1</sup> succinic acid in 0.1 M HNO <sub>3</sub> | AM 1.5G                       | 4                                       | 24       | C <sub>2</sub> H <sub>6</sub> : 56.3, H <sub>2</sub> , CO <sub>2</sub>                                                    | Propionic acid: 92.6                               | (7)       |
| <sup>NCN</sup> CN <sub>x</sub>  Pt                  | 10 mg mL <sup>-1</sup> succinic acid in 0.1 M HNO <sub>3</sub> | AM 1.5G                       | 4                                       | 24       | C <sub>2</sub> H <sub>4</sub> : 1.3, C <sub>2</sub> H <sub>6</sub> : 7.2<br>H <sub>2</sub> , CO <sub>2</sub>              | Propionic acid: 17                                 | (7)       |
| P25 Pt                                              | 2.7 mg mL <sup>-1</sup> PE solution                            | AM 1.5G                       | 4                                       | 96       | C <sub>2</sub> H <sub>4</sub> : 0.21, C <sub>2</sub> H <sub>6</sub> : 2.6<br>H <sub>2</sub> , CO <sub>2</sub>             | N/A                                                | (7)       |
| MoS <sub>2</sub> /CdS                               | 25 mg mL <sup>-1</sup> PE solution                             | AM 1.5G                       | 100                                     | 5        | CH <sub>4</sub> : 196.2, H <sub>2</sub> : 900                                                                             | Formic acid: 9100                                  | (45)      |
| d-NiPS <sub>3</sub> /CdS                            | 10 mg mL <sup>-1</sup> Polylactic acid (PLA) in 2 M KOH        | 300 W Xe lamp                 | 1                                       | 3        | H <sub>2</sub> : 39760                                                                                                    | Pyruvate: 39.03 (9 h),<br>carbonate                | (66)      |
| d-NiPS <sub>3</sub> /CdS                            | 50 mg mL <sup>-1</sup> polyethylene glycol (PET) in 2 M KOH    | 300 W Xe lamp                 | 1                                       | 3        | H <sub>2</sub> : 31380                                                                                                    | Glycolate: 16.42 (9 h)<br>carbonate                | (66)      |
| CN <sub>x</sub>  Ni <sub>2</sub> P                  | 50 mg mL <sup>-1</sup> PLA in 1 M KOH                          | AM 1.5G                       | 3.2                                     | 20       | H <sub>2</sub> : 47                                                                                                       | Acetate: 0.1 (120 h)                               | (81)      |
| CN <sub>x</sub>  Ni <sub>2</sub> P                  | 25 mg mL <sup>-1</sup> PET in 1 M KOH                          | AM 1.5G                       | 3.2                                     | 20       | H <sub>2</sub> : 26                                                                                                       | Glyoxal: 9.3 (120 h)                               | (81)      |
| Nb <sub>2</sub> O <sub>5</sub>                      | 150 mg PE in 50 mL water                                       | 300 W Xe lamp, AM 1.5G filter | 50                                      | 40       | CO <sub>2</sub>                                                                                                           | Acetic acid: 1.58                                  | (46)      |
| Co-Ga <sub>2</sub> O <sub>3</sub>                   | 100 mg PE in 100 mL water                                      | 300 W Xe lamp, AM 1.5G filter | 50                                      | 24       | H <sub>2</sub> : 692, CO: 177.8<br>CO <sub>2</sub>                                                                        | N/A                                                | (82)      |
| Fluorenone                                          | 20.8 mg polystyrene (PS) in 2 mL ethyl acetate                 | 450 nm LED                    | 40 $\mu\text{mol}$                      | 48       | CO, CO <sub>2</sub>                                                                                                       | Benzoic acid: 38%                                  | (14)      |
| Triflic acid                                        | 104 mg PS in 2 mL of benzene and acetonitrile                  | 405 nm LED                    | 5 mol%                                  | 15       | N/A                                                                                                                       | Formic acid: 72%                                   | (83)      |
| ZnO/U <sub>i</sub> O <sub>66</sub> -NH <sub>2</sub> | 1 g Polyvinyl chloride in 50 mL water                          | 300 W Xe lamp                 | 100                                     | 35       | H <sub>2</sub>                                                                                                            | Acetic acid: 9.2%                                  | (84)      |
| <i>M. b</i> -CDPCN                                  | 50 mg mL <sup>-1</sup> PLA and CO <sub>2</sub>                 | 395 nm LED                    | N/A                                     | 576      | CH <sub>4</sub> : 12.57                                                                                                   | N/A                                                | (85)      |
| C <sub>3</sub> N <sub>4</sub>                       | 500 mg PS in acetonitrile                                      | 300 W Xe lamp, 150°C          | 200                                     | 160      | CO <sub>2</sub>                                                                                                           | Benzoic acid: 2184                                 | (86)      |
| Co SSCs                                             | 500 mg PET in ethylene glycol                                  | simulated sunlight, 180°C     | 15                                      | 3        | N/A                                                                                                                       | bis(2-hydroxyethyl) terephthalate: 82.6%           | (87)      |
| Cu <sub>30</sub> Pd <sub>70</sub>  Perovskite Pt    | 50 mg mL <sup>-1</sup> PET in 1 M KOH                          | AM 1.5G                       | Electrode : 1.5 cm <sup>2</sup>         | 10       | H <sub>2</sub> : 77.6 $\mu\text{mol cm}^{-2} \text{h}^{-1}$                                                               | Glycolic acid: 82                                  | (88)      |
| nanoNi-P                                            | 40 mg mL <sup>-1</sup> PET in 2 M KOH                          | AM 1.5G                       | Electrode : 1.0 cm <sup>2</sup>         | 1        | H <sub>2</sub> : 3.1 $\mu\text{mol cm}^{-2} \text{h}^{-1}$                                                                | Formic acid: 244.6                                 | (89)      |

Generation of valuable major products are included.

Selected reports on photocatalytic treatment of plastic waste are added in table S7, including (1) plastic photoreforming, (2) chemical oxidation-decarboxylation, (3) photocatalytic degradation-CO<sub>2</sub> reduction as well as (4) homogeneous catalytic C-C/C-H activation. (1) Photoreforming of plastic waste involves: i) decomposition of plastic waste into monomers; ii) photocatalytic hydrogen evolution coupled with oxidation of monomers into oxygenates. Advanced CdS-based photocatalysts exhibit excellent performance with a hydrogen evolution of ~40 mmol g<sub>cat</sub><sup>-1</sup> h<sup>-1</sup>. However, the oxidation reaction still suffers from low selectivity towards a single high-value product and overoxidation to CO<sub>2</sub>. (2) The reported PE upcycling via chemical oxidation-decarboxylation represents an emerging strategy to simultaneously generate valuable light olefins and single carboxylic acid with high selectivity. Side products generated from chemical oxidation may compete with the main reaction and reduce its activity. (3) One-pot photodegradation coupled with CO<sub>2</sub> reduction can decompose plastic waste with a conversion of nearly 100%, while enabling CO<sub>2</sub> photoreduction. The two-step process can be carried out under mild conditions, but generally requires tens of hours of irradiation to achieve complete decomposition of plastic waste. (4) Upcycling of aromatic polymers has been reported using homogeneous photocatalysts and O<sub>2</sub>. Photo-driven hydrogen atom transfer followed by C-C cleavage enable the direct conversion of plastic waste into aromatic oxygenates with high yields (> 40%). Organic solvents are employed to dissolve plastics but make the reaction system complex and toxic.

Additionally, other solar-driven chemical recycling methods are also reported in table S7, including photo-biocatalysis, photothermal catalysis and photoelectrocatalysis. The biotic-abiotic hybrid methanation of microplastics exhibits excellent stability (up to 4 months) and high selectivity to CH<sub>4</sub>, but the CH<sub>4</sub> yield needs to be improved. Photothermal catalysis can utilize sunlight to heat up the reaction system and boost plastic conversion, but it also aggravates overoxidation. The photothermal effect is a promising strategy that can be applied to thermocatalytic plastic conversions. The current studies on photoelectrocatalysis focus on the reforming of plastics into H<sub>2</sub> and chemicals. Compared to photoreforming, plastic monomer oxidation on the photoelectrode surface can be regulated to achieve high selectivity (up to 90%) to a single valuable oxygenate.

**Table S8. Quantification of components of PE decomposition solution following pretreatment.**

| Conditions | Concentration (5-fold diluted) (mg mL <sup>-1</sup> ) |             |               |             |
|------------|-------------------------------------------------------|-------------|---------------|-------------|
|            | Succinic acid                                         | Acetic acid | Glutaric acid | Adipic acid |
| 160°C 8 h  | 1.98                                                  | 0.30        | 0.89          | 0.01        |

**Table S9. C<sub>2</sub> hydrocarbon evolution on Pd<sub>1</sub>-TiO<sub>2</sub> in PE solutions with ultrapure water, seawater, rainwater, and simulated nitric acid wastewater as solvents. C<sub>2</sub> hydrocarbon production is expressed per mass of photocatalyst.**

| Sample                            | Solvent              | C <sub>2</sub> H <sub>4</sub> production (μmol g <sub>cat</sub> <sup>-1</sup> h <sup>-1</sup> ) | C <sub>2</sub> H <sub>6</sub> production (μmol g <sub>cat</sub> <sup>-1</sup> h <sup>-1</sup> ) |
|-----------------------------------|----------------------|-------------------------------------------------------------------------------------------------|-------------------------------------------------------------------------------------------------|
| Pd <sub>1</sub> -TiO <sub>2</sub> | Ultrapure water      | 23.28                                                                                           | 32.73                                                                                           |
|                                   | Seawater             | 13.65                                                                                           | 19.16                                                                                           |
|                                   | Rainwater            | 15.42                                                                                           | 18.80                                                                                           |
|                                   | Simulated wastewater | 17.85                                                                                           | 20.20                                                                                           |

**Table S10. Pd 3d<sub>5/2</sub> XPS of Pd<sub>1</sub>-TiO<sub>2</sub> in dark and under illumination.**

| Samples           | Peak             | Positions (eV) | FWHM | Percentage |
|-------------------|------------------|----------------|------|------------|
| In dark           | Pd <sup>0</sup>  | 336.20         | 2.00 | 68%        |
|                   | Pd <sup>2+</sup> | 337.42         | 1.90 | 32%        |
| Light irradiation | Pd <sup>0</sup>  | 336.18         | 2.00 | 73%        |
|                   | Pd <sup>2+</sup> | 337.40         | 1.90 | 27%        |

## REFERENCES AND NOTES

1. T. Uekert, C. M. Pichler, T. Schubert, E. Reisner, Solar-driven reforming of solid waste for a sustainable future. *Nat. Sustain.* **4**, 383–391 (2021).
2. R. Geyer, J. R. Jambeck, K. L. Law, Production, use, and fate of all plastics ever made. *Sci. Adv.* **3**, e1700782 (2017).
3. X. Jia, C. Qin, T. Friedberger, Z. Guan, Z. Huang, Efficient and selective degradation of polyethylenes into liquid fuels and waxes under mild conditions. *Sci. Adv.* **2**, e1501591. (2016).
4. F. Zhang, M. Zeng, R. D. Yappert, J. Sun, Y.-H. Lee, A. M. LaPointe, B. Peters, M. M. Abu-Omar, S. L. Scott, Polyethylene upcycling to long-chain alkylaromatics by tandem hydrogenolysis/aromatization. *Science* **370**, 437–441 (2020).
5. G. Lopez, M. Artetxe, M. Amutio, J. Bilbao, M. Olazar, Thermochemical routes for the valorization of waste polyolefinic plastics to produce fuels and chemicals. A review. *Renew. Sustain. Energy Rev.* **73**, 346–368 (2017).
6. K. Hu, P. Zhou, Y. Yang, T. Hall, G. Nie, Y. Yao, X. Duan, S. Wang, Degradation of microplastics by a thermal fenton reaction. *ACS EST Engg.* **2**, 110–120 (2022).
7. C. M. Pichler, S. Bhattacharjee, M. Rahaman, T. Uekert, E. Reisner, Conversion of polyethylene waste into gaseous hydrocarbons via integrated tandem chemical-photo/electrocatalytic processes. *ACS Catal.* **11**, 9159–9167 (2021).
8. H. Nishiyama, T. Yamada, M. Nakabayashi, Y. Maehara, M. Yamaguchi, Y. Kuromiya, Y. Nagatsuma, H. Tokudome, S. Akiyama, T. Watanabe, R. Narushima, S. Okunaka, N. Shibata, T. Takata, T. Hisatomi, K. Domen, Photocatalytic solar hydrogen production from water on a 100-m<sup>2</sup> scale. *Nature* **598**, 304–307 (2021).
9. J. Xie, R. Jin, A. Li, Y. Bi, Q. Ruan, Y. Deng, Y. Zhang, S. Yao, G. Sankar, D. Ma, J. Tang, Highly selective oxidation of methane to methanol at ambient conditions by titanium dioxide-supported iron species. *Nat. Catal.* **1**, 889–896 (2018).

10. S. Zhang, Y. Zhao, R. Shi, C. Zhou, G. I. N. Waterhouse, Z. Wang, Y. Weng, T. Zhang, Sub-3 nm ultrafine Cu<sub>2</sub>O for visible light driven nitrogen fixation. *Angew. Chem. Int. Ed.* **60**, 2554–2560 (2021).
11. S. Nitopi, E. Bertheussen, S. B. Scott, X. Liu, A. K. Engstfeld, S. Horch, B. Seger, I. E. L. Stephens, K. Chan, C. Hahn, J. K. Nørskov, T. F. Jaramillo, I. Chorkendorff, Progress and perspectives of electrochemical CO<sub>2</sub> reduction on copper in aqueous electrolyte. *Chem. Rev.* **119**, 7610–7672 (2019).
12. L. Li, R.-B. Lin, R. Krishna, H. Li, S. Xiang, H. Wu, J. Li, W. Zhou, B. Chen, Ethane/ethylene separation in a metal-organic framework with iron-peroxo sites. *Science* **362**, 443–446 (2018).
13. G. Lopez, M. Artetxe, M. Amutio, J. Alvarez, J. Bilbao, M. Olazar. Recent advances in the gasification of waste plastics. A critical overview. *Renew. Sustain. Energy Rev.* **82**, 576–596 (2018).
14. T. Li, A. Vijeta, C. Casadevall, A. S. Gentleman, T. Euser, E. Reisner. Bridging plastic recycling and organic catalysis: Photocatalytic deconstruction of polystyrene via a C-H oxidation pathway. *ACS Catal.* **12**, 8155–8163 (2022).
15. Z. Huang, Z. Zhao, C. Zhang, J. Lu, H. Liu, N. Luo, J. Zhang, F. Wang, Enhanced photocatalytic alkane production from fatty acid decarboxylation via inhibition of radical oligomerization. *Nat. Catal.* **3**, 170–178 (2020).
16. B. Kraeutler, A. J. Bard, Heterogeneous photocatalytic decomposition of saturated carboxylic acids on titanium dioxide powder. Decarboxylative route to alkanes. *J. Am. Chem. Soc.* **100**, 5985–5992 (1978).
17. J. D. Griffin, M. A. Zeller, D. A. Nicewicz, Hydrodecarboxylation of carboxylic and malonic acid derivatives via organic photoredox catalysis: Substrate scope and mechanistic insight. *J. Am. Chem. Soc.* **137**, 11340–11348 (2015).
18. I. Eş, A. M. Khaneghah, S. M. B. Hashemi, M. Koubaa, Current advances in biological production of propionic acid. *Biotechnol. Lett.* **39**, 635–645 (2017).
19. U.-R. Samel, W. Kohler, A. O. Gamer, U. Keuser, S.-T. Yang, Y. Jin, M. Lin, Z. Wang, J. H. Teles. Propionic acid and derivatives, in *Ullmann's Encyclopedia of Industrial Chemistry* (Wiley-VCH, 2018), pp. 1–20.

20. S. Ji, Y. Chen, X. Wang, Z. Zhang, D. Wang, Y. Li, Chemical synthesis of single atomic site catalysts. *Chem. Rev.* **120**, 11900–11955 (2020).
21. A. Wang, J. Li, T. Zhang, Heterogeneous single-atom catalysis. *Nat. Rev. Chem.* **2**, 65–81 (2018).
22. C. Gao, J. Low, R. Long, T. Kong, J. Zhu, Y. Xiong, Heterogeneous single-atom photocatalysts: Fundamentals and applications. *Chem. Rev.* **120**, 12175–12216 (2020).
23. B. Xia, Y. Zhang, J. Ran, M. Jaroniec, S.-Z. Qiao, Single-atom photocatalysts for emerging reactions. *ACS Cent. Sci.* **7**, 39–54 (2021).
24. R. Li, Z. Zhang, X. Liang, J. Shen, J. Wang, W. Sun, D. Wang, J. Jiang, Y. Li, Polystyrene waste thermochemical hydrogenation to ethylbenzene by a N-bridged Co, Ni dual-atom catalyst. *J. Am. Chem. Soc.* **145**, 16218–16227 (2023).
25. R. Li, D. Wang, Understanding the structure-performance relationship of active sites at atomic scale. *Nano Res.* **15**, 6888–6923 (2022).
26. X. Ge, P. Zhou, Q. Zhang, Z. Xia, S. Chen, P. Gao, Z. Zhang, L. Gu, S. Guo, Palladium single atoms on TiO<sub>2</sub> as a photocatalytic sensing platform for analyzing the organophosphorus pesticide chlorpyrifos. *Angew. Chem. Int. Ed.* **59**, 232–236 (2020).
27. W. Jiang, J. Low, K. Mao, D. Duan, S. Chen, W. Liu, C.-W. Pao, J. Ma, S. Sang, C. Shu, X. Zhan, Z. Qi, H. Zhang, Z. Liu, X. Wu, R. Long, L. Song, Y. Xiong, Pd-modified ZnO-Au enabling alkoxy intermediates formation and dehydrogenation for photocatalytic conversion of methane to ethylene. *J. Am. Chem. Soc.* **143**, 269–278 (2021).
28. Y. Guo, Y. Huang, B. Zeng, B. Han, M. Akri, M. Shi, Y. Zhao, Q. Li, Y. Su, L. Li, Q. Jiang, Y.-T. Cui, L. Li, R. Li, B. Qiao, T. Zhang, Photo-thermo semi-hydrogenation of acetylene on Pd<sub>1</sub>/TiO<sub>2</sub> single-atom catalyst. *Nat. Commun.* **13**, 2648 (2022).
29. J. Shan, C. Ye, C. Zhu, J. Dong, W. Xu, L. Chen, Y. Jiao, Y. Jiang, L. Song, Y. Zhang, M. Jaroniec, Y. Zhu, Y. Zheng, S.-Z. Qiao, Integrating interactive noble metal single-atom catalysts into transition metal oxide lattices. *J. Am. Chem. Soc.* **144**, 23214–23222 (2022).

30. H. Jin, X. Liu, P. An, C. Tang, H. Yu, Q. Zhang, H.-J. Peng, L. Gu, Y. Zheng, T. Song, K. Davey, U. Paik, J. Dong, S.-Z. Qiao, Dynamic rhenium dopant boosts ruthenium oxide for durable oxygen evolution. *Nat. Commun.* **14**, 354 (2023).
31. P. Liu, Y. Zhao, R. Qin, S. Mo, G. Chen, L. Gu, D. M. Chevrier, P. Zhang, Q. Guo, D. Zang, B. Wu, G. Fu, N. Zheng, Photochemical route for synthesizing atomically dispersed palladium catalysts. *Science* **352**, 797–800 (2016).
32. S. Zhang, Y. Zhao, R. Shi, C. Zhou, G. I. N. Waterhouse, L.-Z. Wu, C.-H. Tung, T. Zhang, Efficient photocatalytic nitrogen fixation over  $\text{Cu}^{\delta+}$ -modified defective ZnAl-layered double hydroxide nanosheets. *Adv. Energy Mater.* **10**, 1901973 (2020).
33. K. Fujiwara, U. Muller, S. E. Pratsinis, Pd subnano-clusters on  $\text{TiO}_2$  for solar-light removal of  $\text{NO}$ . *ACS Catal.* **6**, 1887–1893 (2016).
34. L. Kuai, Z. Chen, S. Liu, E. Kan, N. Yu, Y. Ren, C. Fang, X. Li, Y. Li, B. Geng, Titania supported synergistic palladium single atoms and nanoparticles for room temperature ketone and aldehydes hydrogenation. *Nat. Commun.* **11**, 48 (2020).
35. K. Fujiwara, S. E. Pratsinis, Single Pd atoms on  $\text{TiO}_2$  dominate photocatalytic  $\text{NO}_x$  removal. *Appl Catal B* **226**, 127–134 (2018).
36. W. Zhang, C. Fu, J. Low, D. Duan, J. Ma, W. Jiang, Y. Chen, H. Liu, Z. Qi, R. Long, Y. Yao, X. Li, H. Zhang, Z. Liu, J. Yang, Z. Zou, Y. Xiong, High-performance photocatalytic nonoxidative conversion of methane to ethane and hydrogen by heteroatoms-engineered  $\text{TiO}_2$ . *Nat. Commun.* **13**, 2806 (2022).
37. L. Kuai, S. Liu, S. Cao, Y. Ren, E. Kan, Y. Zhao, N. Yu, F. Li, X. Li, Z. Wu, X. Wang, B. Geng, Atomically dispersed Pt/metal oxide mesoporous catalysts from synchronous pyrolysis-deposition route for water-gas shift reaction. *Chem. Mater.* **30**, 5534–5538 (2018).
38. L. Luo, L. Fu, H. Liu, Y. Xu, J. Xing, C.-R. Chang, D.-Y. Yang, J. Tang, Synergy of Pd atoms and oxygen vacancies on  $\text{In}_2\text{O}_3$  for methane conversion under visible light. *Nat. Commun.* **13**, 2930 (2022).

39. L. Liu, A. Corma, Metal catalysts for heterogeneous catalysis: From single atoms to nanoclusters and nanoparticles. *Chem. Rev.* **118**, 4981–5079 (2018).
40. M. G. Walter, E. L. Warren, J. R. McKone, S. W. Boettcher, Q. Mi, E. A. Santori, N. S. Lewis, Solar water splitting cells. *Chem. Rev.* **110**, 6446–6473 (2010).
41. W.-M. Cheng, R. Shang, Y. Fu, Irradiation-induced palladium-catalyzed decarboxylative desaturation enabled by a dual ligand system. *Nat. Commun.* **9**, 5215 (2018).
42. G.-Z. Wang, R. Shang, W.-M. Cheng, Y. Fu, Irradiation-induced Heck reaction of unactivated alkyl halides at room temperature. *J. Am. Chem. Soc.* **139**, 18307–18312 (2017).
43. P. Chuentragool, M. Parasram, Y. Shi, V. Gevorgyan, General, mild, and selective method for desaturation of aliphatic amines. *J. Am. Chem. Soc.* **140**, 2465–2468 (2018).
44. J. Liu, M. Jiao, L. Lu, H. M. Barkholtz, Y. Li, Y. Wang, L. Jiang, Z. Wu, D. Liu, L. Zhuang, C. Ma, J. Zeng, B. Zhang, D. Su, P. Song, W. Xing, W. Xu, Y. Wang, Z. Jiang, G. Sun, High performance platinum single atom electrocatalyst for oxygen reduction reaction. *Nat. Commun.* **8**, 15938 (2017).
45. M. Du, Y. Zhang, S. Kang, X. Guo, Y. Ma, M. Xing, Y. Zhu, Y. Chai, B. Qiu, Trash to treasure: Photoreforming of plastic waste into commodity chemicals and hydrogen over MoS<sub>2</sub>-tipped CdS nanorods. *ACS Catal.* **12**, 12823–12832 (2022).
46. X. Jiao, K. Zheng, Q. Chen, X. Li, Y. Li, W. Shao, J. Xu, J. Zhu, Y. Pan, Y. Sun, Y. Xie, Photocatalytic conversion of waste plastics into C<sub>2</sub> fuels under simulated natural environment conditions. *Angew. Chem. Int. Ed.* **59**, 15497–15501 (2020).
47. C. Cassani, G. Bergonzini, C.-J. Wallentin, Photocatalytic decarboxylative reduction of carboxylic acids and its application in asymmetric synthesis. *Org. Lett.* **16**, 4228–4231 (2014).
48. D. W. Manley, J. C. Walton, A clean and selective radical homocoupling employing carboxylic acids with titania photoredox catalysis. *Org. Lett.* **16**, 5394–5397 (2014).



49. J. Guo, Y. Zheng, Z. Hu, C. Zheng, J. Mao, K. Du, M. Jaroniec, S.-Z. Qiao, T. Ling, Direct seawater electrolysis by adjusting the local reaction environment of a catalyst. *Nat. Energy* **8**, 264–272 (2023).
50. D. Li, Y. Zhao, Y. Miao, C. Zhou, L.-P. Zhang, L.-Z. Wu, T. Zhang, Accelerating electron-transfer dynamics by TiO<sub>2</sub>-immobilized reversible single-atom copper for enhanced artificial photosynthesis of urea. *Adv. Mater.* **34**, e2207793 (2022).
51. R. Chen, F. Fan, T. Dittrich, C. Li, Imaging photogenerated charge carriers on surfaces and interfaces of photocatalysts with surface photovoltage microscopy. *Chem. Soc. Rev.* **47**, 8238–8262 (2018).
52. D. Gross, I. Mora-Seró, T. Dittrich, A. Belaidi, C. Mauser, A. J. Houtepen, E. D. Como, A. L. Rogach, J. Feldmann, Charge separation in type II tunneling multilayered structures of CdTe and CdSe nanocrystals directly proven by surface photovoltage spectroscopy. *J. Am. Chem. Soc.* **132**, 5981–5983 (2010).
53. J. Ran, H. Zhang, S. Fu, M. Jaroniec, J. Shan, B. Xia, Y. Qu, J. Qu, S. Chen, L. Song, J. M. Cairney, L. Jing, S.-Z. Qiao, NiPS<sub>3</sub> ultrathin nanosheets as versatile platform advancing highly active photocatalytic H<sub>2</sub> production. *Nat. Commun.* **13**, 4600 (2022).
54. Y. Sun, W. Chang, H. Ji, C. Chen, W. Ma, J. Zhao, An unexpected fluctuating reactivity for odd and even carbon numbers in the TiO<sub>2</sub>-based photocatalytic decarboxylation of C<sub>2</sub>-C<sub>6</sub> dicarboxylic acids. *Chemistry* **20**, 1861–1870 (2014).
55. I. Dolamic, T. Bürgi, Photocatalysis of dicarboxylic acids over TiO<sub>2</sub>: An in situ ATR-IR study. *J. Catal.* **248**, 268–276 (2007).
56. S. Kang, B. Xing, Adsorption of dicarboxylic acids by clay minerals as examined by in situ ATR-FTIR and ex situ DRIFT. *Langmuir* **23**, 7024–7031 (2007).
57. L. Chen, Y. Li, X. Zhang, Q. Zhang, T. Wang, L. Ma, Mechanistic insights into the effects of support on the reaction pathway for aqueous-phase hydrogenation of carboxylic acid over the supported Ru catalysts. *Appl. Catal. A. Gen.* **478**, 117–128 (2014).

58. I. Dolamic, T. Bürgi, Photoassisted decomposition of malonic acid on TiO<sub>2</sub> studied by in situ attenuated total reflection infrared spectroscopy. *J. Phys. Chem. B* **110**, 14898–14904 (2006).
59. S. Zhang, Y. Zhao, Y. Miao, Y. Xu, J. Ran, Z. Wang, Y. Weng, T. Zhang, Understanding aerobic nitrogen photooxidation on titania through in situ time-resolved spectroscopy. *Angew. Chem. Int. Ed.* **61**, e202211469 (2022).
60. C. Wang, X. Li, Y. Ren, H. Jiao, F. R. Wang, J. Tang, Synergy of Ag and AgBr in a pressurized flow reactor for selective photocatalytic oxidative coupling of methane. *ACS Catal.* **13**, 3768–3774 (2023).
61. M.-Y. Gao, H. Bai, X. Cui, S. Liu, S. Ling, T. Kong, B. Bai, C. Hu, Y. Dai, Y. Zhao, L. Zhang, J. Zhang, Y. Xiong, Precisely tailoring heterometallic polyoxotitanium clusters for the efficient and selective photocatalytic oxidation of hydrocarbons. *Angew. Chem. Int. Ed.* **61**, e202215540 (2022).
62. Y. Chen, C. Zou, M. Mastalerz, S. Hu, C. Gasaway, X. Tao, Applications of micro-Fourier transform infrared spectroscopy (FTIR) in the geological sciences—A review. *Int. J. Mol. Sci.* **16**, 30223–30250 (2015).
63. C. M. Pichler, S. Bhattacharjee, E. Lam, L. Su, A. Collauto, M. M. Roessler, S. J. Cobb, V. M. Badiani, M. Rahaman, E. Reisner, Bio-electrocatalytic conversion of food waste to ethylene via succinic acid as the central intermediate. *ACS Catal.* **12**, 13360–13371 (2022).
64. L. M. Betts, F. Dappozze, C. Guillard, Understanding the photocatalytic degradation by P25 TiO<sub>2</sub> of acetic acid and propionic acid in the pursuit of alkane production. *Appl. Catal. A. Gen.* **554**, 35–43 (2018).
65. Y. Nosaka, A. Y. Nosaka, Generation and detection of reactive oxygen species in photocatalysis. *Chem. Rev.* **117**, 11302–11336 (2017).
66. S. Zhang, H. Li, L. Wang, J. Liu, G. Liang, K. Davey, J. Ran, S.-Z. Qiao, Boosted photoreforming of plastic waste via defect-rich NiPS<sub>3</sub> nanosheets. *J. Am. Chem. Soc.* **145**, 6410–6419 (2023).
67. D. Ma, S. Zhai, Y. Wang, A. Liu, C. Chen, TiO<sub>2</sub> photocatalysis for transfer hydrogenation. *Molecules* **24**, 330 (2019).

68. J. M. Ferreira, Jr., G. F. Trindade, R. Tshulu, J. F. Watts, M. A. Baker, Dicarboxylic acids analysed by x-ray photoelectron spectroscopy, Part II—Butanedioic acid anhydrous. *Surf. Sci. Spectra* **24**, 011102 (2017).
69. B.-H. Lee, S. Park, M. Kim, A. K. Sinha, S. C. Lee, E. Jung, W. J. Chang, K.-S. Lee, J. H. Kim, S.-P. Cho, H. Kim, K. T. Nam, T. Hyeon, Reversible and cooperative photoactivation of single-atom Cu/TiO<sub>2</sub> photocatalysts. *Nat. Mater.* **18**, 620–626 (2019).
70. X. Sun, J. Chen, T. Ritter, Catalytic dehydrogenative decarboxyolefination of carboxylic acids. *Nat. Chem.* **10**, 1229–1233 (2018).
71. C. Kang, L. Jing, T. Guo, H. Cui, J. Zhou, H. Fu, Mesoporous SiO<sub>2</sub>-modified nanocrystalline TiO<sub>2</sub> with high anatase thermal stability and large surface area as efficient photocatalyst. *J. Phys. Chem. C* **113**, 1006–1013 (2009).
72. R. Bagri, P. T. Williams, Catalytic pyrolysis of polyethylene. *J. Anal. Appl. Pyrolysis* **63**, 29–41 (2002).
73. M. Artetxe, G. Lopez, M. Amutio, G. Elordi, J. Bilbao, M. Olazar, Cracking of high density polyethylene pyrolysis waxes on HZSM-5 catalysts of different acidity. *Ind. Eng. Chem. Res.* **52**, 10637–10645 (2013).
74. F. Ateş, N. Miskolczi, N. Borsodi, Comparison of real waste (MSW and MPW) pyrolysis in batch reactor over different catalysts. Part I: Product yields, gas and pyrolysis oil properties. *Bioresour. Technol.* **133**, 443–454 (2013).
75. N. Lee, J. Joo, K.-Y. A. Lin, J. Lee, Waste-to-fuels: Pyrolysis of low-density polyethylene waste in the presence of H-ZSM-11. *Polymers* **13**, 1198 (2021).
76. M. Kusenberg, M. Roosen, A. Zayoud, M. R. Djokic, H. D. Thi, S. D. Meester, K. Ragaert, U. Kresovic, K. M. V. Geem, Assessing the feasibility of chemical recycling via steam cracking of untreated plastic waste pyrolysis oils: Feedstock impurities, product yields and coke formation. *Waste Manag.* **141**, 104–114 (2022).

77. I. I. Ahmed, N. Nipattummakul, A. K. Gupta, Characteristics of syngas from co-gasification of polyethylene and woodchips. *Appl. Energy* **88**, 165–174 (2011).
78. A. Eschenbacher, F. Goodarzi, R. J. Varghese, K. Enemark-Rasmussen, S. Kegnæs, M. S. Abbas-Abadi, K. M. V. Geem, Boron-modified mesoporous ZSM-5 for the conversion of pyrolysis vapors from LDPE and mixed polyolefins: Maximizing the C<sub>2</sub>–C<sub>4</sub> olefin yield with minimal carbon footprint. *ACS Sustainable Chem. Eng.* **9**, 14618–14630 (2021).
79. W. Kaminsky, B. Schlesselmann, C. Simon, Olefins from polyolefins and mixed plastics by pyrolysis. *J. Anal. Appl. Pyrolysis* **32**, 19–27 (1995).
80. E. Bäckström, K. Odelius, M. Hakkarainen, Trash to treasure: Microwave-assisted conversion of polyethylene to functional chemicals. *Ind. Eng. Chem. Res.* **56**, 14814–14821 (2017).
81. T. Uekert, H. Kasap, E. Reisner, Photoreforming of nonrecyclable plastic waste over a carbon nitride/nickel phosphide catalyst. *J. Am. Soc. Chem.* **141**, 15201–15210 (2019).
82. J. Xu, X. Jiao, K. Zheng, W. Shao, S. Zhu, X. Li, J. Zhu, Y. Pan, Y. Sun, Y. Xie, Plastics-to-syngas photocatalysed by Co-Ga<sub>2</sub>O<sub>3</sub> nanosheets. *Natl. Sci. Rev.* **9**, nwac011 2022.
83. Z. Huang, M. Shanmugam, Z. Liu, A. Brookfield, E. L. Bennett, R. Guan, D. E. Vega Herrera, J. A. Lopez-Sanchez, A. G. Slater, E. J. L. McInnes, X. Qi, J. Xiao, Chemical recycling of polystyrene to valuable chemicals via selective acid-catalyzed aerobic oxidation under visible light. *J. Am. Soc. Chem.* **144**, 6532–6542 (2022).
84. J. Qin, Y. Dou, J. Zhou, V. M. Candelario, H. R. Andersen, C. Helix-Nielsen, W. Zhang, Photocatalytic valorization of plastic waste over zinc oxide encapsulated in a metal-organic framework. *Adv. Funct. Mater.* **33**, 2214839 (2023).
85. J. Ye, Y. Chen, C. Gao, C. Wang, A. Hu, G. Dong, Z. Chen, S. Zhou, Y. Xiong, Sustainable conversion of microplastics to methane with ultrahigh selectivity by a biotic-abiotic hybrid photocatalytic system. *Angew. Chem. Int. Ed.* **61**, e202213244 (2022).

86. R. Cao, M.-Q. Zhang, C. Hu, D. Xiao, M. Wang, D. Ma, Catalytic oxidation of polystyrene to aromatic oxygenates over a graphitic carbon nitride catalyst. *Nat. Commun.* **13**, 4809 (2022).
87. Y. Liu, X. Wang, Q. Li, T. Yan, X. Lou, C. Zhang, M. Cao, L. Zhang, T.-K. Sham, Q. Zhang, L. He, J. Chen, Photothermal catalytic polyester upcycling over cobalt single-site catalyst. *Adv. Funct. Mater.* **33**, 2210283 (2023).
88. S. Bhattacharjee, V. Andrei, C. Pornrungrroj, M. Rahaman, C. M. Pichler, E. Reisner, Reforming of soluble biomass and plastic derived waste using a bias-free Cu<sub>30</sub>Pd<sub>70</sub>|perovskite|Pt photoelectrochemical device. *Adv. Funct. Mater.* **32**, 2109313 (2021).
89. C.-Y. Lin, S.-C. Huang, Y.-G. Lin, L.-C. Hsu, C.-T. Yi, Electrosynthesized Ni-P nanospheres with high activity and selectivity towards photoelectrochemical plastics reforming. *Appl Catal B* **296**, 120351 (2021).
